# Supplementary material for: An amorphous/nanocrystalline NixP/Ni heterojunction for electrooxidation of hydrazine
Source: Royal Society of Chemistry journal article supplement (doi:10.1039/d3ta01866k), 2023-01-01
Supplement: d3ta01866k1.pdf [file d3ta01866k1.pdf]

## Supporting Information

**An amorphous/nanocrystalline  $\text{Ni}_x\text{P}/\text{Ni}$  heterojunction for electrooxidation of hydrazine**

Jia-Fu Liu, He Wen, Zeng-Yao Zhang and Ping Wang\*

School of Materials Science and Engineering, South China University of Technology,

Guangzhou 510641, P. R. China

\*Corresponding Author.

E-mail: mspwang@scut.edu.cn (P. Wang)

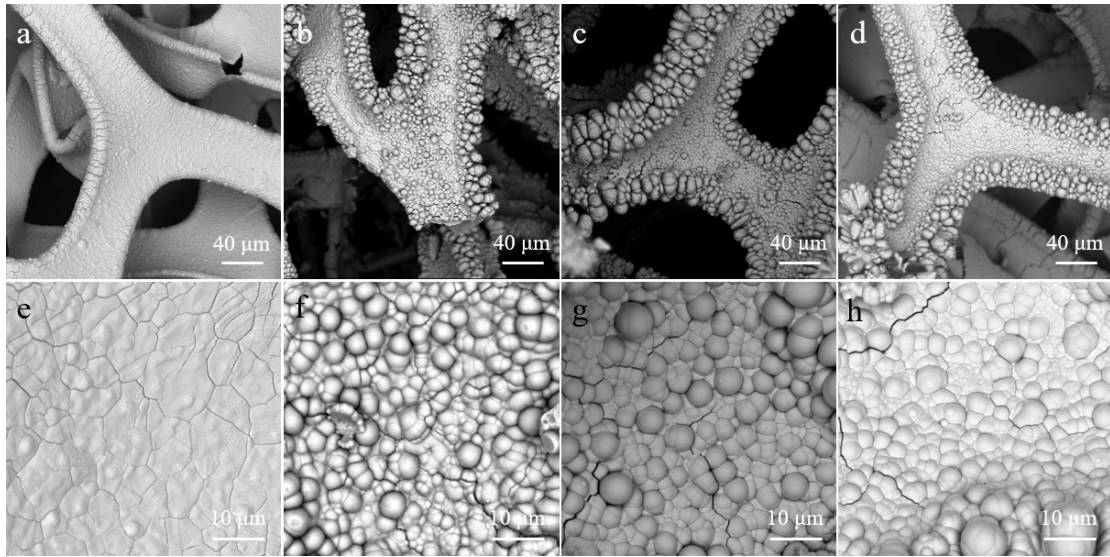

**Figure S1.** SEM images at different magnifications of the  $\alpha$ -Ni<sub>x</sub>P/Ni/NF catalysts prepared by electrodeposition for a duration of (a, e) 15 min, (b, f) 30 min, (c, g) 60 min, (d, h) 90 min.

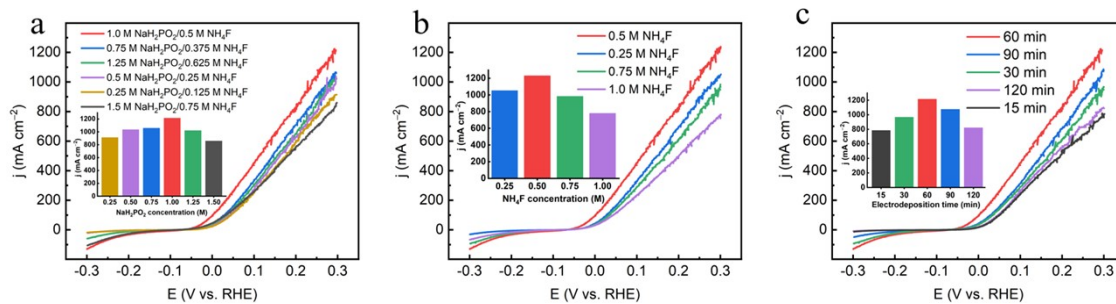

**Figure S2.** (a) LSV curves of the samples that were electrodeposited in the electrolyte of different concentrations of  $\text{NaH}_2\text{PO}_2$  and  $\text{NH}_4\text{F}$ . The inset shows the current density dependence on the  $\text{NaH}_2\text{PO}_2$  concentration. The current density values were extracted from (a) at 0.3 V vs. RHE. (b) LSV curves of the samples that were electrodeposited in the electrolyte of different concentrations of  $\text{NH}_4\text{F}$  while keeping the  $\text{NaH}_2\text{PO}_2$  concentration at 1 M. The inset shows the current density dependence on the  $\text{NH}_4\text{F}$  concentration. (c) LSV curves of the samples that were electrodeposited in an electrolyte of 1.0 M  $\text{NaH}_2\text{PO}_2$ /0.5 M  $\text{NH}_4\text{F}$  for different durations. The inset shows the current density dependence on the electrodeposition duration. All electrochemical tests were carried out in an electrolyte containing 0.5 M  $\text{N}_2\text{H}_4 \cdot \text{H}_2\text{O}$  and 1 M  $\text{NaOH}$ .

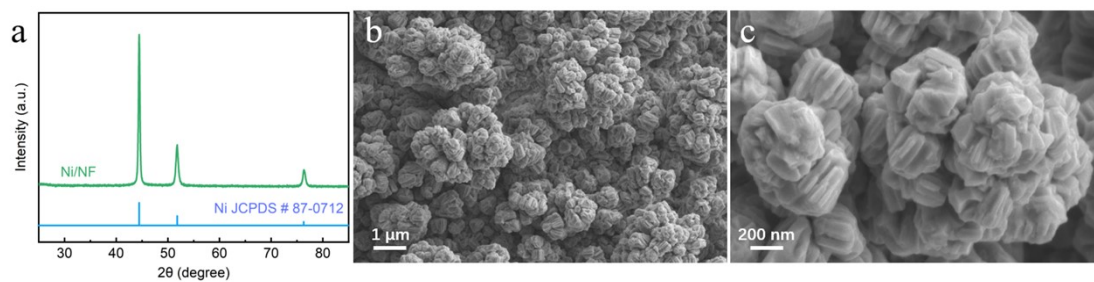

**Figure S3.** (a) XRD pattern and (b, c) SEM images of the Ni/NF catalyst prepared by electrodeposition method using an electrolyte without P source. In preparation of the samples for XRD analysis, we used Cu foil to replace Ni foam at cathode side. The thus-prepared samples were then scraped off from Cu foil.

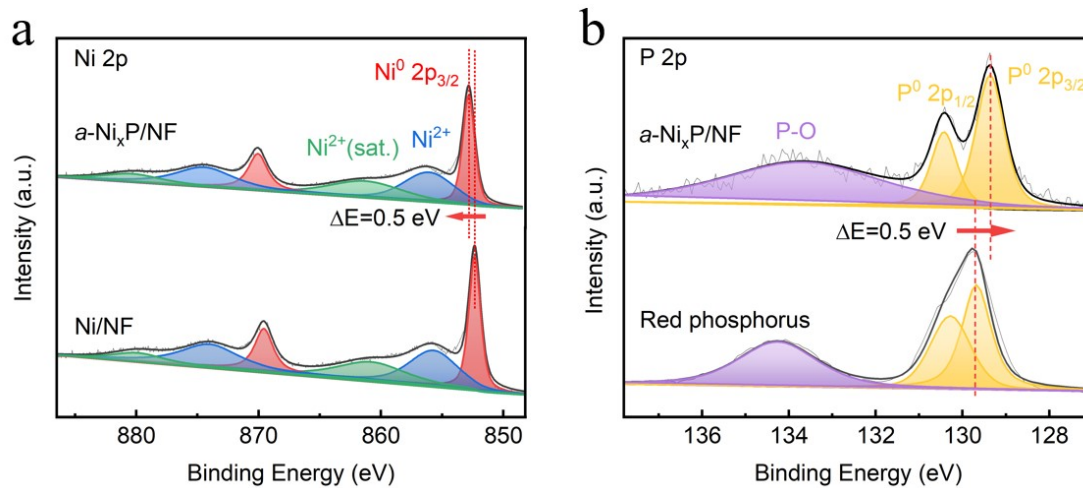

**Figure S4.** XPS spectra of the  $\alpha$ -Ni<sub>x</sub>P/NF catalyst and Ni/NF, red phosphorus reference samples in the Ni 2p and P 2p regions.

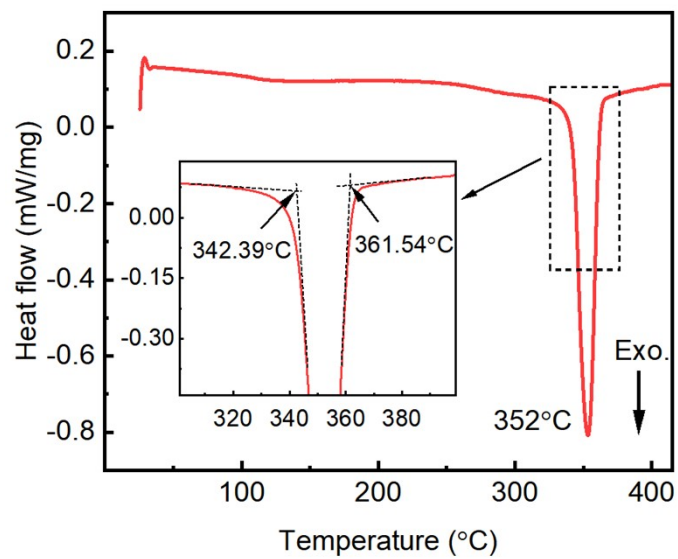

**Figure S5.** DSC curve of the  $\alpha$ -Ni<sub>x</sub>P/Ni sample. The inset shows an enlarged view of the section of interest.

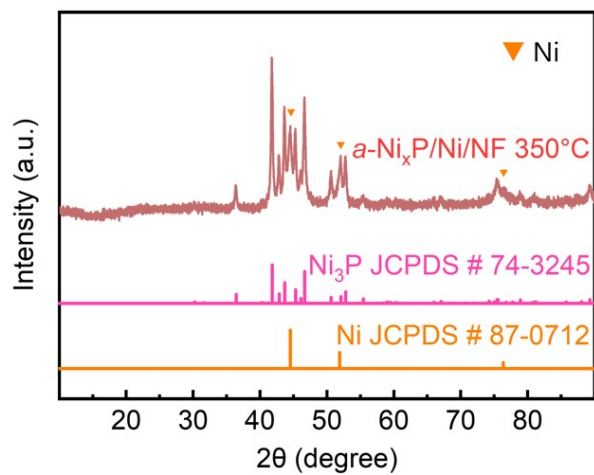

**Figure S6.** XRD pattern of the calcined catalyst at 350 °C under Ar atmosphere for 1 h.

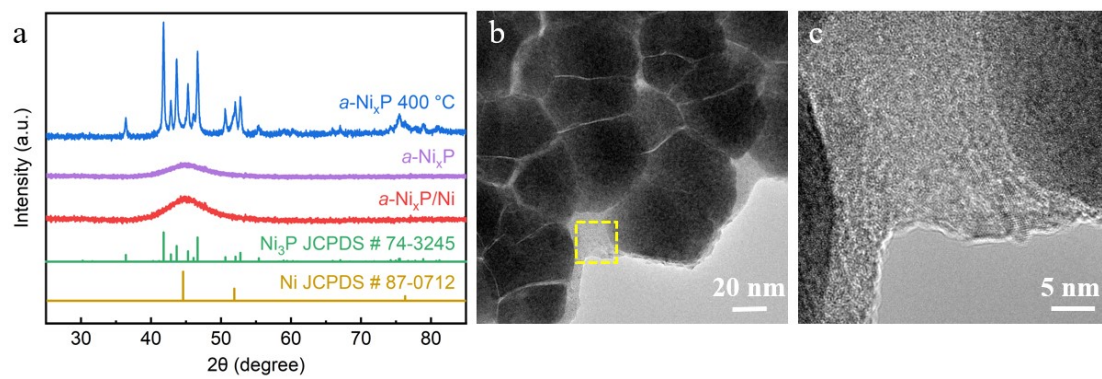

**Figure S7.** (a) XRD patterns of *a*-Ni<sub>x</sub>P/Ni, *a*-Ni<sub>x</sub>P and the post-calcined *a*-Ni<sub>x</sub>P at 400 °C under Ar atmosphere for 1 h. (b) TEM image and (c) HRTEM image of *a*-Ni<sub>x</sub>P.



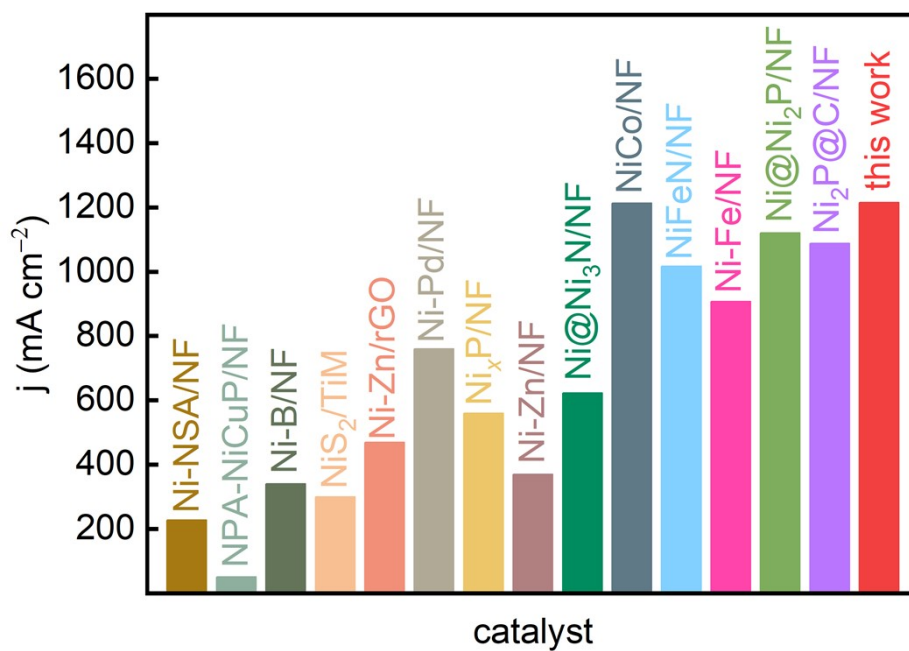

**Figure S8.** A comparison of catalytic activities of representative HzOR electrocatalysts. The measurement conditions of the catalysts can be found in Table S2.

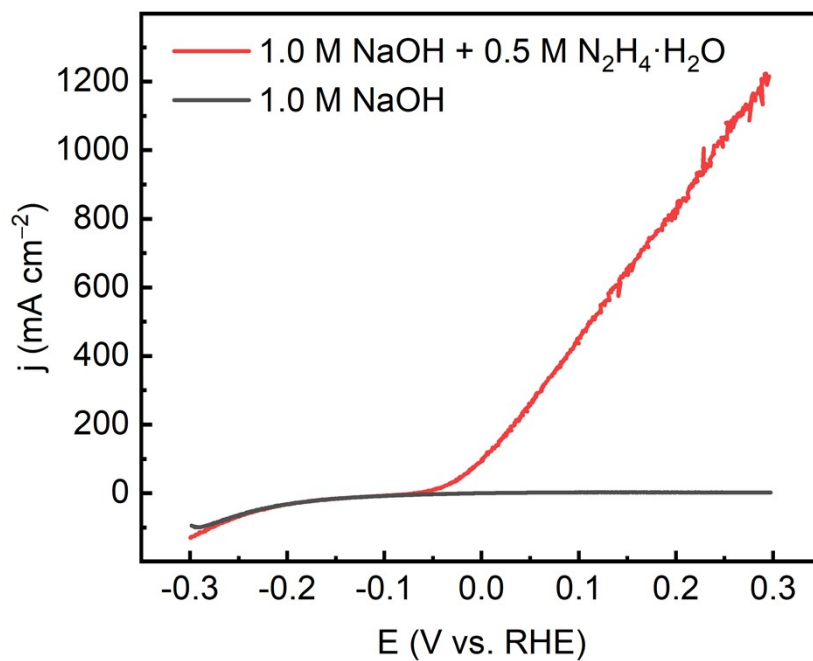

**Figure S9.** A comparison of the LSV curves of the  $\alpha$ -Ni<sub>x</sub>P/Ni/NF catalyst in an electrolyte with and without N<sub>2</sub>H<sub>4</sub>·H<sub>2</sub>O, respectively.

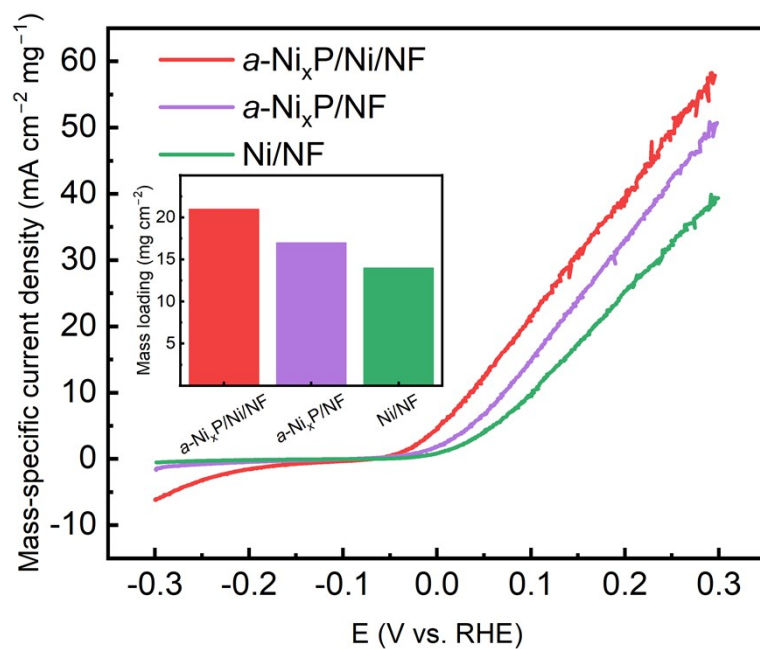

**Figure S10.** Mass-specific current densities and mass loadings (inset) of *a*-Ni<sub>x</sub>P/Ni/NF, *a*-Ni<sub>x</sub>P/NF, and Ni/NF catalysts.

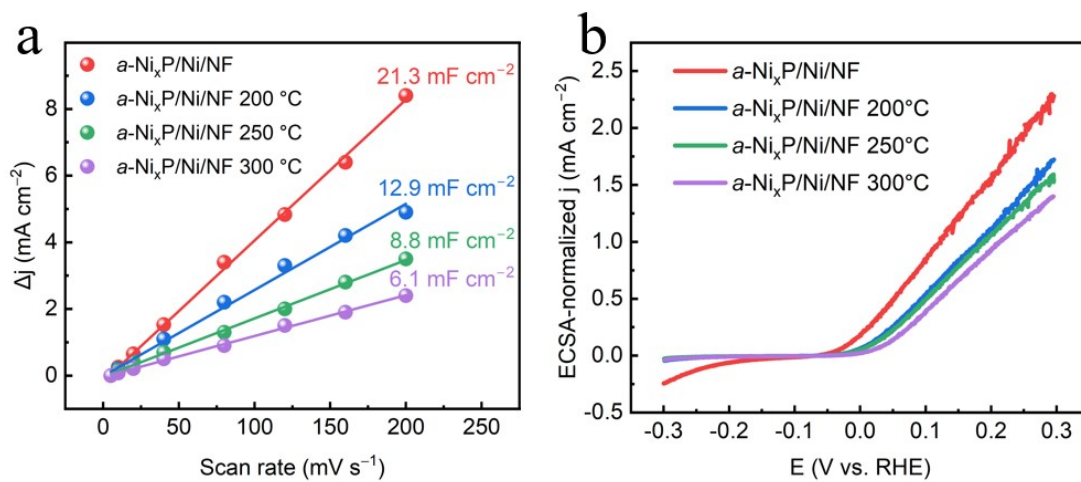

**Figure S11.** (a) Plots of capacitive current density as a function of scan rate at OCP and (b) the ECSA-normalized activities of  $a\text{-Ni}_x\text{P/Ni/NF}$  and its crystalline counterparts.

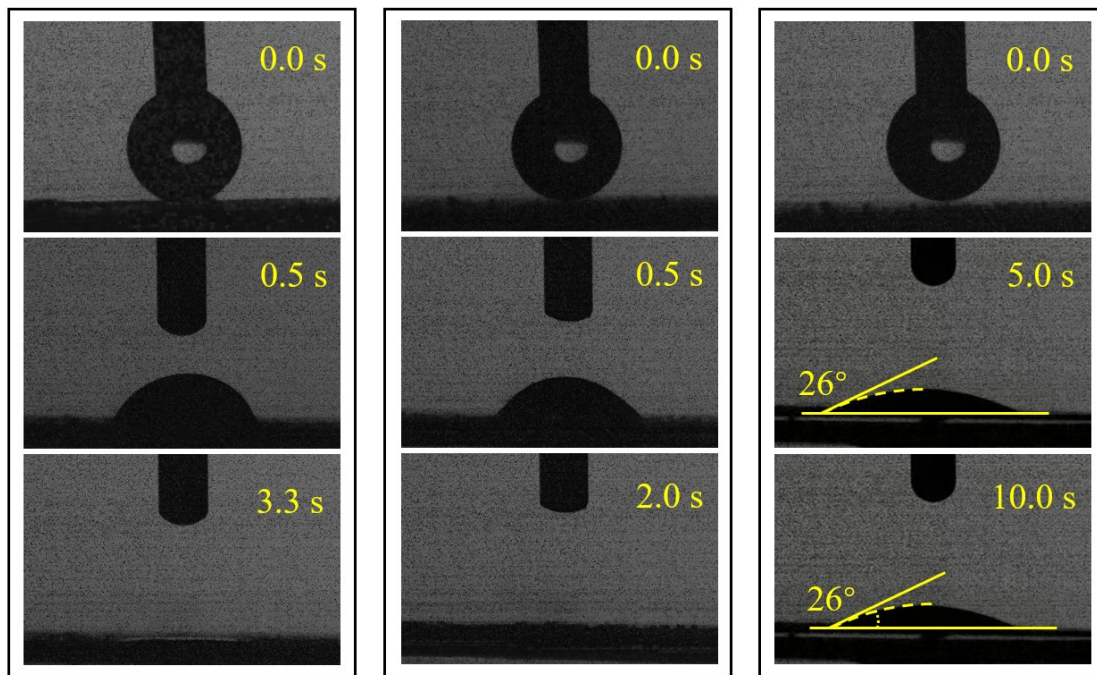

**Figure S12.** Contact-angle measurement results of (left)  $\alpha$ -Ni<sub>x</sub>P/Ni/NF, (middle)  $\alpha$ -Ni<sub>x</sub>P/NF and (right) Ni/NF.

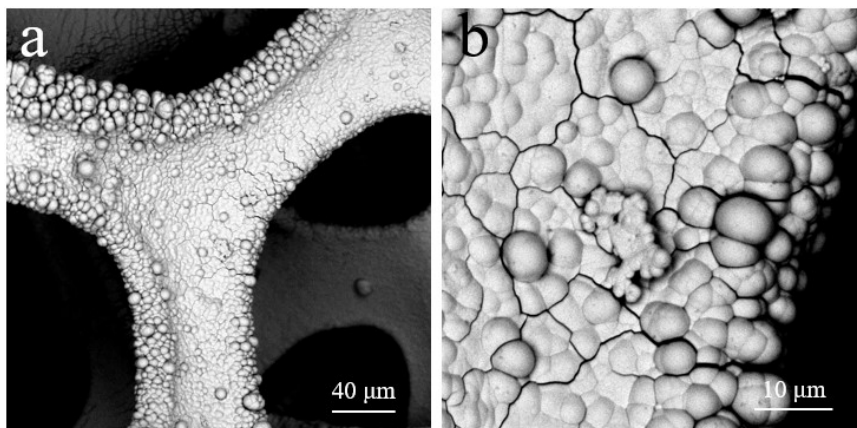

**Figure S13.** FE-SEM images of the  $\alpha$ -Ni<sub>x</sub>P/NF catalyst at different magnifications.

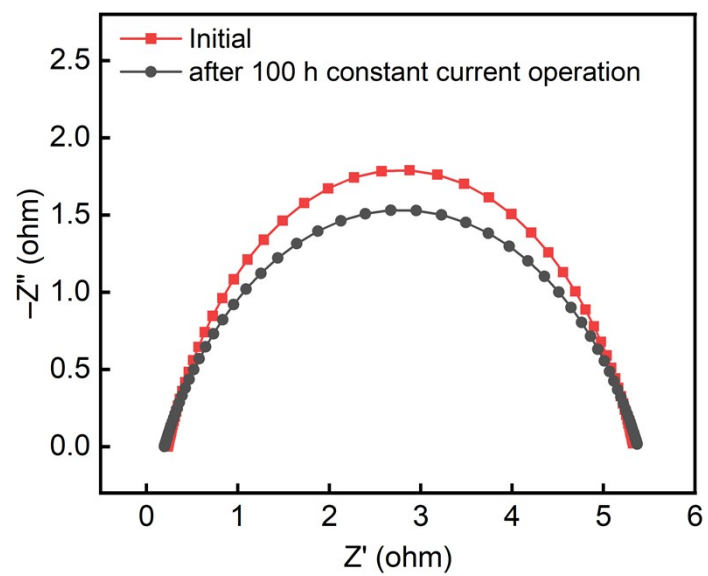

**Figure S14.** EIS Nyquist plots of the  $\alpha$ -Ni<sub>x</sub>P/Ni/NF catalyst before and after 100 hours of constant current operation.

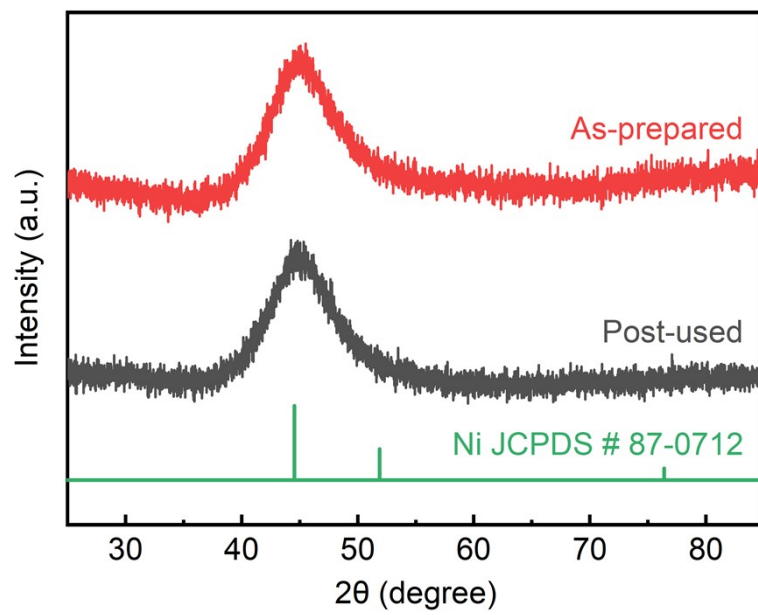

**Figure S15.** A comparison of the XRD patterns of the as-prepared and post-used  $\alpha$ -Ni<sub>x</sub>P/Ni catalysts.



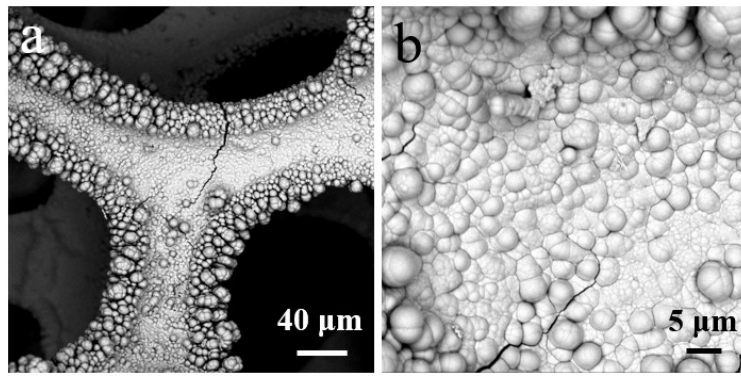

**Figure S16.** FE-SEM images of  $\alpha$ -Ni<sub>x</sub>P/Ni/NF after 100 hours of operation.

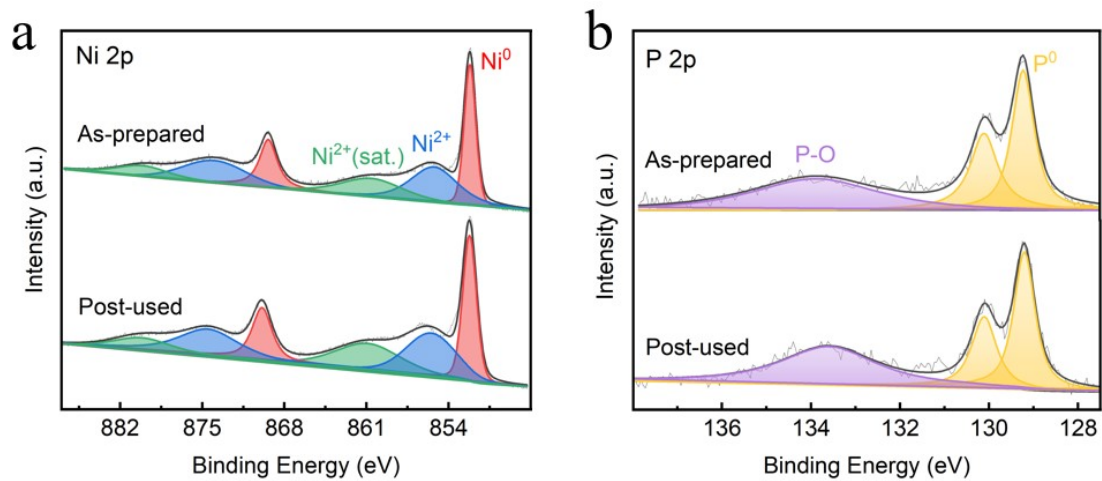

**Figure S17.** XPS spectra of the as-prepared and post-used  $\alpha$ -Ni<sub>x</sub>P/Ni/NF catalysts in the Ni 2p and P 2p regions.

**Table S1.** Chemical composition of the samples that were electrodeposited at room temperature using the electrolyte of different concentrations of NaH<sub>2</sub>PO<sub>2</sub> and NH<sub>4</sub>F.

| Sample                                   | Electrolyte (M)                  |                   | Ni (at%) | P (at%) |
|------------------------------------------|----------------------------------|-------------------|----------|---------|
|                                          | NaH <sub>2</sub> PO <sub>2</sub> | NH <sub>4</sub> F |          |         |
| <i>α</i> -Ni <sub>x</sub> P/Ni-1#        | 0.250                            | 0.125             | 85.85    | 14.15   |
| <i>α</i> -Ni <sub>x</sub> P/Ni-2#        | 0.500                            | 0.250             | 83.69    | 16.31   |
| <i>α</i> -Ni <sub>x</sub> P/Ni-3#        | 0.750                            | 0.375             | 80.61    | 19.39   |
| <i>α</i> -Ni <sub>x</sub> P/Ni-4#        | 1.000                            | 0.500             | 78.92    | 21.08   |
| <i>α</i> -Ni <sub>x</sub> P/Ni-5#        | 1.250                            | 0.625             | 78.55    | 21.45   |
| <i>α</i> -Ni <sub>x</sub> P/Ni-6#        | 1.500                            | 0.750             | 78.74    | 21.26   |
| <i>α</i> -Ni <sub>x</sub> P/Ni-7#        | 1.000                            | 0.250             | 81.08    | 18.92   |
| <i>α</i> -Ni <sub>x</sub> P/Ni-8#        | 1.000                            | 0.750             | 78.73    | 21.27   |
| <i>α</i> -Ni <sub>x</sub> P/Ni-9#        | 1.000                            | 1.000             | 78.48    | 21.52   |
| <i>α</i> -Ni <sub>x</sub> P <sup>a</sup> | 1.000                            | 1.000             | 74.97    | 25.03   |

<sup>a</sup> Electrodeposited at 60 °C

**Table S2.** A comparison of the electrocatalytic performance of representative self-supported HzOR catalysts

| Catalyst                          | Electrolyte (M)               |                 | Electrocatalytic performance |                                    |        | Reference |
|-----------------------------------|-------------------------------|-----------------|------------------------------|------------------------------------|--------|-----------|
|                                   | N <sub>2</sub> H <sub>4</sub> | OH <sup>-</sup> | <i>E</i><br>(V vs. RHE)      | <i>j</i><br>(mA cm <sup>-2</sup> ) | FE (%) |           |
| Ni-NSA                            | 0.5                           | 3.0             | 0.25                         | 227.6                              | /      | [1]       |
| NPA-NiCuP                         | 0.005                         | 1.0             | 0.35                         | 51.4                               | /      | [2]       |
| Ni-B/NF                           | 0.1                           | 1.0             | 0.30                         | 340                                | 100    | [3]       |
| NiS <sub>2</sub> /TiM             | 0.5                           | 1.0             | 0.22                         | 300                                | 100    | [4]       |
| Ni-Zn/rGO                         | 0.1                           | 1.0             | 0.30                         | 469                                | 100    | [5]       |
| Ni-Pd/NF                          | 0.1                           | 1.0             | 0.60                         | 760                                | 100    | [6]       |
| Ni <sub>x</sub> P/NF              | 0.1                           | 1.0             | 0.30                         | 580                                | 100    | [7]       |
| Ni-Zn/NF                          | 0.1                           | 1.0             | 0.30                         | 370                                | 100    | [8]       |
| Ni@Ni <sub>3</sub> N/NF           | 0.5                           | 1.0             | 0.30                         | 623                                | 100    | [9]       |
| Ni-Co/NF                          | 0.5                           | 1.0             | 0.30                         | 1213                               | 100    | [10]      |
| NiFeN/NF                          | 0.5                           | 1.0             | 0.30                         | 1017                               | 100    | [11]      |
| Ni-Fe/NF                          | 0.5                           | 1.0             | 0.30                         | 907                                | 100    | [12]      |
| Ni@Ni <sub>2</sub> P/NF           | 0.5                           | 1.0             | 0.30                         | 1120                               | 100    | [13]      |
| Ni <sub>2</sub> P@C/NF            | 0.5                           | 1.0             | 0.30                         | 1088                               | 100    | [14]      |
| <i>α</i> -Ni <sub>x</sub> P/Ni/NF | 0.5                           | 1.0             | 0.30                         | 1215                               | 100    | This work |

<sup>a</sup> All potentials were obtained with respect to the RHE at pH=14.

<sup>b</sup> FE denotes Faradaic efficiency.

**Table S3.** A comparison of the performance of homemade DHzFCs using self-supported HzOR catalysts.

| Anode    Cathode                                   | $c(\text{N}_2\text{H}_4)/(\text{OH}^-)$ | Temp. ( $^{\circ}\text{C}$ ) | OCV (V) | $P_{\text{max}}$ (mW $\text{cm}^{-2}$ ) | Reference |
|----------------------------------------------------|-----------------------------------------|------------------------------|---------|-----------------------------------------|-----------|
| p-Co/CF    Pt/C                                    | 1.5/6.0                                 | 25                           | 1.1     | 185.9                                   | [15]      |
| Cu Nanostructure film    Pt/C                      | 6.3/4.0                                 | 80                           | 1.0     | 160.8                                   | [16]      |
| FeSA/CNT    Pt/C                                   | 1.5/1.0                                 | 80                           | 0.83    | 97.1                                    | [17]      |
| $\text{Ni}_3\text{N-Co}_3\text{N PNAs/NF}$    Pt/C | 0.5/1.0                                 | 25                           | 1.0     | 60.3                                    | [18]      |
| Mo- $\text{Ni}_3\text{N/Ni/NF}$    Pt/C            | 0.5/1.0                                 | 25                           | 0.96    | 37.8                                    | [19]      |
| FeNiP-NPHC    FeNiP-NPHC                           | 0.5/1.0                                 | 25                           | 0.98    | 31                                      | [20]      |
| $\alpha\text{-Ni}_x\text{P/Ni/NF}$    Pt/C         | 3.0/1.0                                 | 25                           | 0.94    | 133                                     | This work |

## References

1. Y. Kuang, G. Feng, P. Li, Y. Bi, Y. Li, X. Sun, *Angew. Chem. Int. Ed.*, 2016, **55**, 693-697.
2. X. L. Wang, Y. X. Zheng, M. L. Jia, L. S. Yuan, C. Peng, W. H. Yang, *Int. J. Hydrogen Energy*, 2016, **41**, 8449-8458.
3. X. P. Wen, H. B. Dai, L. S. Wu, P. Wang, *Appl. Surf. Sci.*, 2017, **409**, 132-139.
4. J. M. Wang, X. Ma, T. T. Liu, D. N. Liu, S. Hao, G. Du, R. M. Kong, A. M. Asiri, X. P. Sun, *Mater. Today Energy*, 2017, **3**, 9-14.
5. Z. B. Feng, D. G. L, L. Wang, Q. Sun, P. Lu, P. F. Xing, M. Z. An, *J. Alloys Compd.*, 2019, **788**, 1240-1245.
6. L. S. Wu, X. P. Wen, H. Wen, H. B. Dai, P. Wang, *J. Power Sources*, 2019, **412**, 71-77.
7. H. Wen, L. Y. Gan, H. B. Dai, X. P. Wen, L. S. Wu, H. Wu, P. Wang, *Appl. Catal. B-Environ.*, 2019, **241**, 292-298.
8. Z. B. Feng, D. G. L, L. Wang, Q. Sun, P. Lu, P. F. Xing, M. Z. An, *Electrochim. Acta*, 2019, **304**, 275-281.
9. X. Lin, H. Wen, D. X. Zhang, G. X. Cao, P. Wang, *J. Mater. Chem. A*, 2020, **8**, 632-638.
10. P. P. Tang, X. Lin, H. Yin, D. X. Zhang, H. Wen, J. J. Wang, P. Wang, *ACS Sustainable Chem. Eng.*, 2020, **8**, 16583-16590.
11. P. P. Tang, H. Wen, P. Wang, *Chem. Eng. J.*, 2022, **431**, 134123.
12. Z. Y. Zhang, P. P. Tang, H. Wen, P. Wang, *J. Alloys Compd.*, 2022, **906**, 164370.
13. C. Chen, H. Wen, P. P. Tang, P. Wang, *ACS Sustainable Chem. Eng.*, 2021, **9**, 4564-4570.
14. W. T. Dai, H. Wen, Z. Y. Zhang, P. Wang, *J. Alloys Compd.*, 2022, **902**, 163746.
15. Q. Liu, X. Liao, Y. Tang, J. Wang, X. Lv, X. Pan, R. Lu, Y. Zhao, X.-Y. Yu and H. B. Wu, *Energy Environ. Sci.*, 2022, **15**, 3246-3256.
16. Z. Lu, M. Sun, T. Xu, Y. Li, W. Xu, Z. Chang, Y. Ding, X. Sun and L. Jiang, *Adv. Mater.*, 2015, **27**, 2361-2366.
17. J. Zhang, Y. Wang, C. Yang, S. Chen, Z. Li, Y. Cheng, H. Wang, Y. Xiang, S. Lu and S. Wang, *Nano Res.*, 2021, **14**, 4650-4657.

18. Q. Qian, J. Zhang, J. Li, Y. Li, X. Jin, Y. Zhu, Y. Liu, Z. Li, A. El-Harairy, C. Xiao, G. Zhang, Y. Xie, *Angew. Chem. Int. Ed.*, 2021, 60, 5984-5993.
19. Y. Liu, J. Zhang, Y. Li, Q. Qian, Z. Li and G. Zhang, *Adv. Funct. Mater.*, 2021, **31**, 2103673.
20. Q. Yu, X. Liu, G. Liu, X. Wang, Z. Li, B. Li, Z. Wu and L. Wang, *Adv. Funct. Mater.*, 2022, **32**, 2205767.
